# Supplementary material for: Handling of Fresh Vegetables: Knowledge, Hygienic Behavior of Vendors, Public Health in Maputo Markets, Mozambique
Source: MDPI journal article supplement (doi:10.3390/ijerph17176302), 2020-08-29
Supplement: s1 [file s1]

## Supplementary Materials

**Table S1 – Resume of vendors’ attitude and their knowledge on Good Hygiene Practices.**

| <i>VARIABLES</i>                                      | <i>MARKETS</i>     |                       |                             |                    |                    |                  |                |
|-------------------------------------------------------|--------------------|-----------------------|-----------------------------|--------------------|--------------------|------------------|----------------|
| <b>ACESS TO TAP WATER</b>                             | <b>BENFICA N/%</b> | <b>XIPAMANINE N/%</b> | <b>CENTRAL DA BAIXA N/%</b> | <b>ZIMPETO N/%</b> | <b>FAJARDO N/%</b> | <b>TOTAL N/%</b> | <b>P VALUE</b> |
| YES                                                   | 16/80.0%           | 6/50.0%               | 10/100%                     | 17/89.0%           | 14/100%            | 63/84.0%         |                |
| NO                                                    | 4/20.0%            | 6/50.0%               | 0/0%                        | 2/11.0%            | 0/0%               | 12/16.0%         |                |
| TOTAL                                                 |                    |                       |                             |                    |                    | 75/100%          | 0.004          |
| <b>WASHING PRODUCTS BEFORE SALE</b>                   | <b>BENFICA</b>     | <b>XIPAMANINE</b>     | <b>CENTRAL DA BAIXA</b>     | <b>ZIMPETO</b>     | <b>FAJARDO</b>     | <b>TOTAL N/%</b> | <b>P VALUE</b> |
| YES                                                   | 14/70.0%           | 8/66.7%               | 8/80.0%                     | 6/31.6%            | 4/28.6%            | 40/53.3%         |                |
| NO                                                    | 6/30.0%            | 4/33.3%               | 2/20.0%                     | 13/68.4%           | 10/71.4%           | 35/46.7%         |                |
| TOTAL                                                 |                    |                       |                             |                    | 14/19%             | 75/100%          | 0.035          |
| <b>HOW DO YOU WASH THEM?</b>                          | <b>BENFICA</b>     | <b>XIPAMANINE</b>     | <b>CENTRAL DA BAIXA</b>     | <b>ZIMPETO</b>     | <b>FAJARDO</b>     | <b>TOTAL N/%</b> | <b>P VALUE</b> |
| RUNNING WATER                                         | 0/0%               | 0/0%                  | 1/12.5%                     | 2/33.3%            | 0/0%               | 3/7.5%           |                |
| IN RECIPIENTS (BUCKETS AND GALLONS)                   | 14/100%            | 8/100%                | 7/87.5%                     | 4/66.7             | 4/100%             | 37/92.5%         |                |
| TOTAL                                                 |                    |                       |                             |                    |                    | 40/100%          | 0.010          |
| <b>DO YOU THINK VEGETABLES CAN CAUSE DISEASE?</b>     | <b>BENFICA</b>     | <b>XIPAMANINE</b>     | <b>CENTRAL DA BAIXA</b>     | <b>ZIMPETO</b>     | <b>FAJARDO</b>     | <b>TOTAL N/%</b> | <b>P VALUE</b> |
| YES                                                   | 14/70.0%           | 8/67.0%               | 6/60.0%                     | 12/63.0%           | 8/57.0%            | 48/64.0%         |                |
| NO                                                    | 6/30.0%            | 2/17.0%               | 3/30.0%                     | 7/37.0%            | 2/14.0%            | 20/26.7%         |                |
| CAN NOT SAY                                           | 0/0%               | 2/17.0%               | 1/10.0%                     | 0/0%               | 4/29.0%            | 7/9.3%           |                |
|                                                       |                    |                       |                             |                    |                    | 75/100%          | 0.164          |
| <b>WHY DO YOU THINK VEGETABLES CAN CAUSE DISEASE?</b> | <b>BENFICA</b>     | <b>XIPAMANINE</b>     | <b>CENTRAL DA BAIXA</b>     | <b>ZIMPETO</b>     | <b>FAJARDO</b>     | <b>TOTAL N/%</b> | <b>P VALUE</b> |
| LACK OF HYGIENE                                       | 5/35.7%            | 1/12.5%               | 4/66.7%                     | 4/33.3%            | 1/12.5%            | 15/31.3%         |                |
| PESTICIDES                                            | 6/42.9%            | 7/87.5%               | 2/33.3%                     | 8/66.7%            | 6/75.0%            | 29/60.4%         |                |
| PESTICIDES & LACK OF HYGIENE                          | 2/14.3%            | 0/0%                  | 0/0%                        | 0/0%               | 1/12.5%            | 3/6.3%           |                |
| CAN NOT SAY                                           | 1/7.1%             | 0/0%                  | 0/0%                        | 0/0%               | 0/0%               | 1/2.1%           |                |
| TOTAL                                                 |                    |                       |                             |                    |                    | 48/100%          | 0.611          |
| <b>HOW DO YOU TRANSPORT THE PRODUCTS?</b>             | <b>BENFICA</b>     | <b>XIPAMANINE</b>     | <b>CENTRAL DA BAIXA</b>     | <b>ZIMPETO</b>     | <b>FAJARDO</b>     | <b>TOTAL N/%</b> | <b>P VALUE</b> |
| OPEN-TRUCK VEHICLE                                    | 7/35.0%            | 9/75.0%               | 5/50.0%                     | 16/84,2%           | 7/50.0%            | 44/58.7%         |                |
| TCHOVA                                                | 4/20.0%            | 0/0%                  | 0/0%                        | 2/10.5%            | 0/0%               | 6/8.0%           |                |
| PUBLIC TRANSPORT                                      | 1/5.0%             | 2/16.7%               | 2/20.0%                     | 0/0%               | 0/0%               | 5/6.7%           |                |
| ON FOOT                                               | 1/5.0%             | 1/8.3%                | 0/0%                        | 1/5.3%             | 1/7.1%             | 4/5.3%           |                |
| OPEN-TRUCK VEHICLE AND PUBLIC TRANSPORT               | 7/35.0%            | 0/0%                  | 3/30.0%                     | 0/0%               | 6/42.9%            | 16/21.3%         |                |
| TOTAL                                                 |                    |                       |                             |                    |                    | 75/100%          | 0.014          |
| <b>WHERE DO YOU STORE THE</b>                         | <b>BENFICA</b>     | <b>XIPAMANINE</b>     | <b>CENTRAL DA BAIXA</b>     | <b>ZIMPETO</b>     | <b>FAJARDO</b>     | <b>TOTAL N/%</b> | <b>P VALUE</b> |

|                                                      |                |                   |                             |                |                |                      |                    |
|------------------------------------------------------|----------------|-------------------|-----------------------------|----------------|----------------|----------------------|--------------------|
| <b>PRODUCTS IN THE<br/>END OF THE DAY?</b>           |                |                   |                             |                |                |                      |                    |
| AT HOME                                              | 4/20.0%        | 1/8.3%            | 0/0%                        | 5/26.3%        | 3/21.4%        | 13/17.3%             |                    |
| PRIVATE<br>STOREHOUSE<br>OUTSIDE THE<br>MARKET       | 9/45.0%        | 1/8.3%            | 0/0%                        | 0/0%           | 6/42.9%        | 16/21.3%             |                    |
| PRIVATE<br>STOREHOUSE<br>INSIDE THE<br>MARKET        | 2/10.0%        | 5/41.7%           | 0/0%                        | 8/42.1%        | 2/14.3%        | 17/22.7%             |                    |
| BELOW THE STAND<br>IN THE MARKET                     | 5/25.0%        | 5/41.7%           | 10/100%                     | 6/31.6%        | 3/21.4%        | 29/38.7%             |                    |
| TOTAL                                                |                |                   |                             |                |                | 75/100%              | 0.000              |
| <b>IS THERE ANY<br/>TOILET NEAR?</b>                 | <b>BENFICA</b> | <b>XIPAMANINE</b> | <b>CENTRAL<br/>DA BAIXA</b> | <b>ZIMPETO</b> | <b>FAJARDO</b> | <b>TOTAL<br/>N/%</b> | <b>P<br/>VALUE</b> |
| YES, FROM CITY<br>COUNCIL (CC)                       | 16/80.0%       | 11/91.7%          | 10/100%                     | 16/84.2%       | 9/64.3%        | 62/82.7%             |                    |
| YES, PRIVATE                                         | 3/15.0%        | 1/8.3%            | 0/0%                        | 3/15.8%        | 4/28.6%        | 11/14.7%             |                    |
| YES, FROM CC AND<br>PRIVATE                          | 1/5.0%         | 0/0%              | 0/0%                        | 0/0%           | 1/7.1%         | 2/2.7%               |                    |
| TOTAL                                                |                |                   |                             |                |                | 75/100%              | 0.506              |
| <b>IS THERE WATER?<br/>HOW IS IT<br/>AVAILABLE?</b>  | <b>BENFICA</b> | <b>XIPAMANINE</b> | <b>CENTRAL<br/>DA BAIXA</b> | <b>ZIMPETO</b> | <b>FAJARDO</b> | <b>TOTAL<br/>N/%</b> | <b>P<br/>VALUE</b> |
| YES, TAP WATER                                       | 1/5.0%         | 0/0%              | 10/100%                     | 8/42.1%        | 7/50.0%        | 26/34.7%             |                    |
| YES, IN RECIPIENTS                                   | 17/85.0%       | 7/58.3%           | 0/0%                        | 10/52.6%       | 6/42.9%        | 40/52.3%             |                    |
| SOMETIMES IN<br>RECIPIENTS                           | 1/5.0%         | 3/25%             | 0/0%                        | 1/5.3%         | 1/7.1%         | 6/8.0%               |                    |
| NO                                                   | 1/5.0%         | 2/16.7%           | 0/0%                        | 0/0%           | 0/0%           | 3/4.0%               |                    |
| TOTAL                                                |                |                   |                             |                |                | 75/100%              | 0.000              |
| <b>HOW IS THE<br/>GARBAGE<br/>COLLECTION?</b>        | <b>BENFICA</b> | <b>XIPAMANINE</b> | <b>CENTRAL<br/>DA BAIXA</b> | <b>ZIMPETO</b> | <b>FAJARDO</b> | <b>TOTAL<br/>N/%</b> | <b>P<br/>VALUE</b> |
| IN TRASH BAGS AND<br>AFTER DUMP IN<br>THE CONTAINERS | 18/90.0%       | 12/100%           | 6/60.0%                     | 17/89.5%       | 9/64.3%        | 62/82.7%             |                    |
| DIRECTLY TO THE<br>CONTAINERS                        | 1/5.0%         | 0/0%              | 4/40.0%                     | 2/10.5%        | 4/28.6%        | 11/14.7%             |                    |
| BOTH TYPES                                           | 1/5.0%         | 0/0%              | 0/0%                        | 0/0%           | 1/7.1%         | 2/2.7%               |                    |
| TOTAL                                                |                |                   |                             |                |                | 75/100%              | 0.084              |
